# Supplementary material
Source: Research Square preprint supplement (doi:10.21203/rs.3.rs-8585990/v1)
Supplement: Supplementary file 1 [file ef31717968af63fff639e425.docx]

****
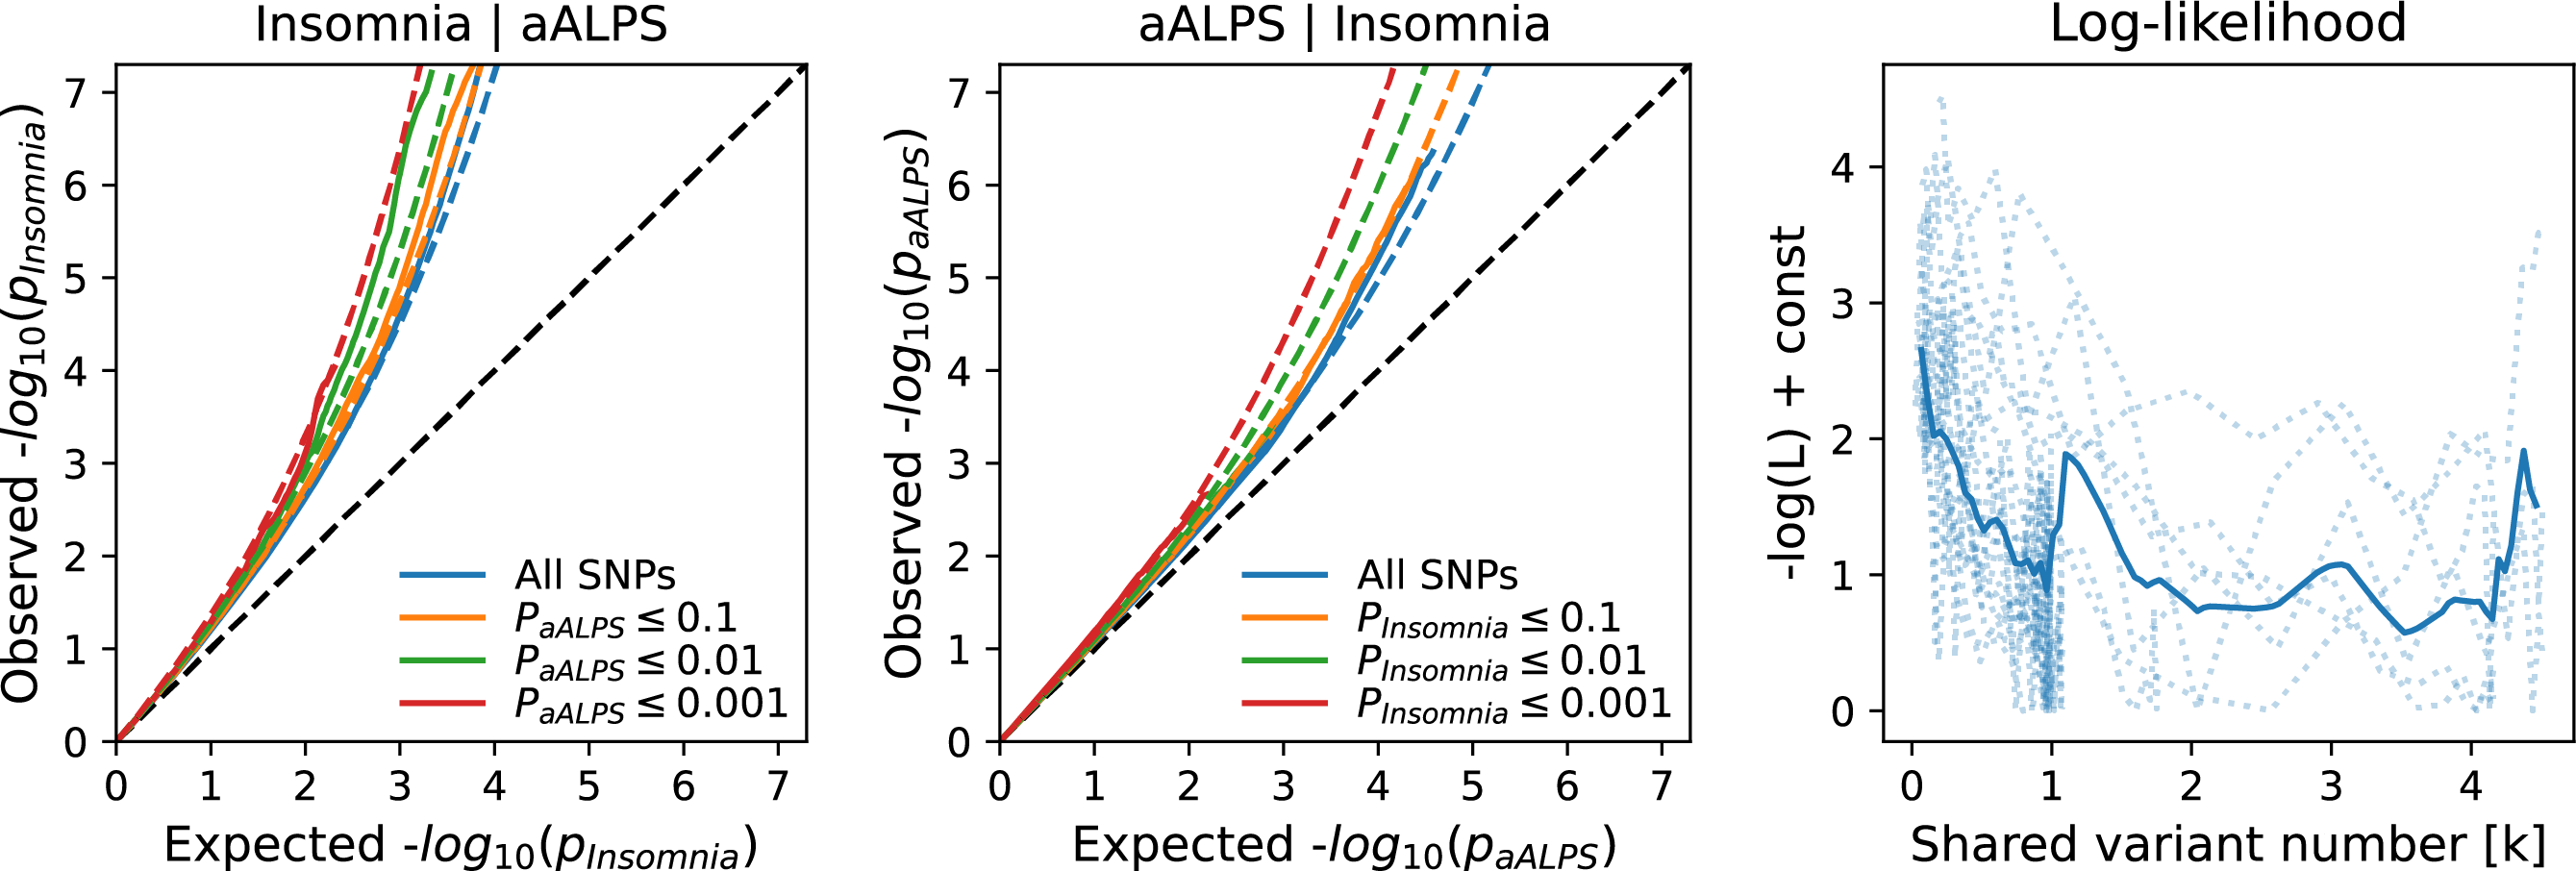
****

****Figure S1.****Insomnia and aALPS exhibit polygenic overlap. The MiXeR conditional QQ plot indicates enrichment of cross-trait SNPs. Lastly, the log-likelihood estimates from each of the 20 MiXeR iterations are presented.


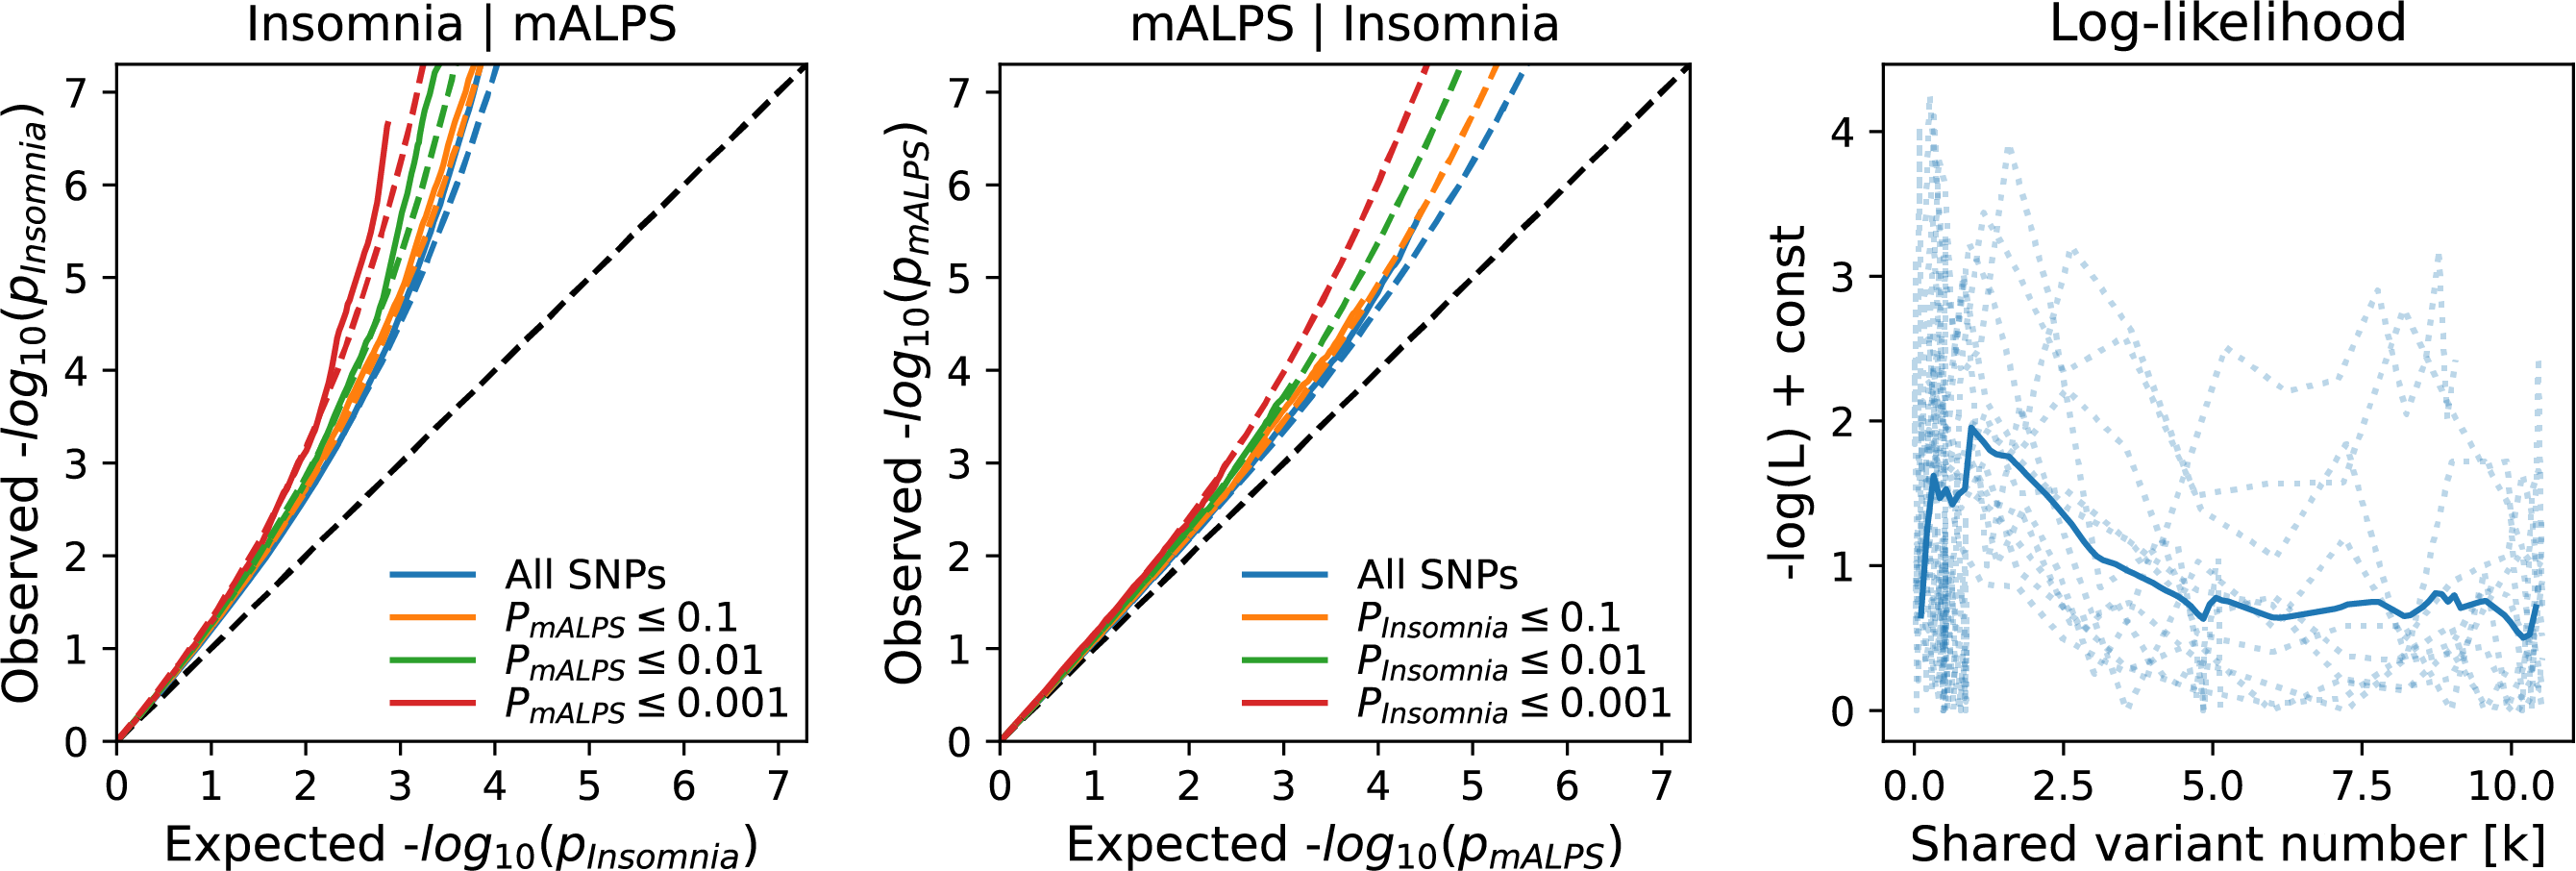


****Figure S2.****Insomnia and mALPS exhibit polygenic overlap. The MiXeR conditional QQ plot indicates enrichment of cross-trait SNPs. Lastly, the log-likelihood estimates from each of the 20 MiXeR iterations are presented.


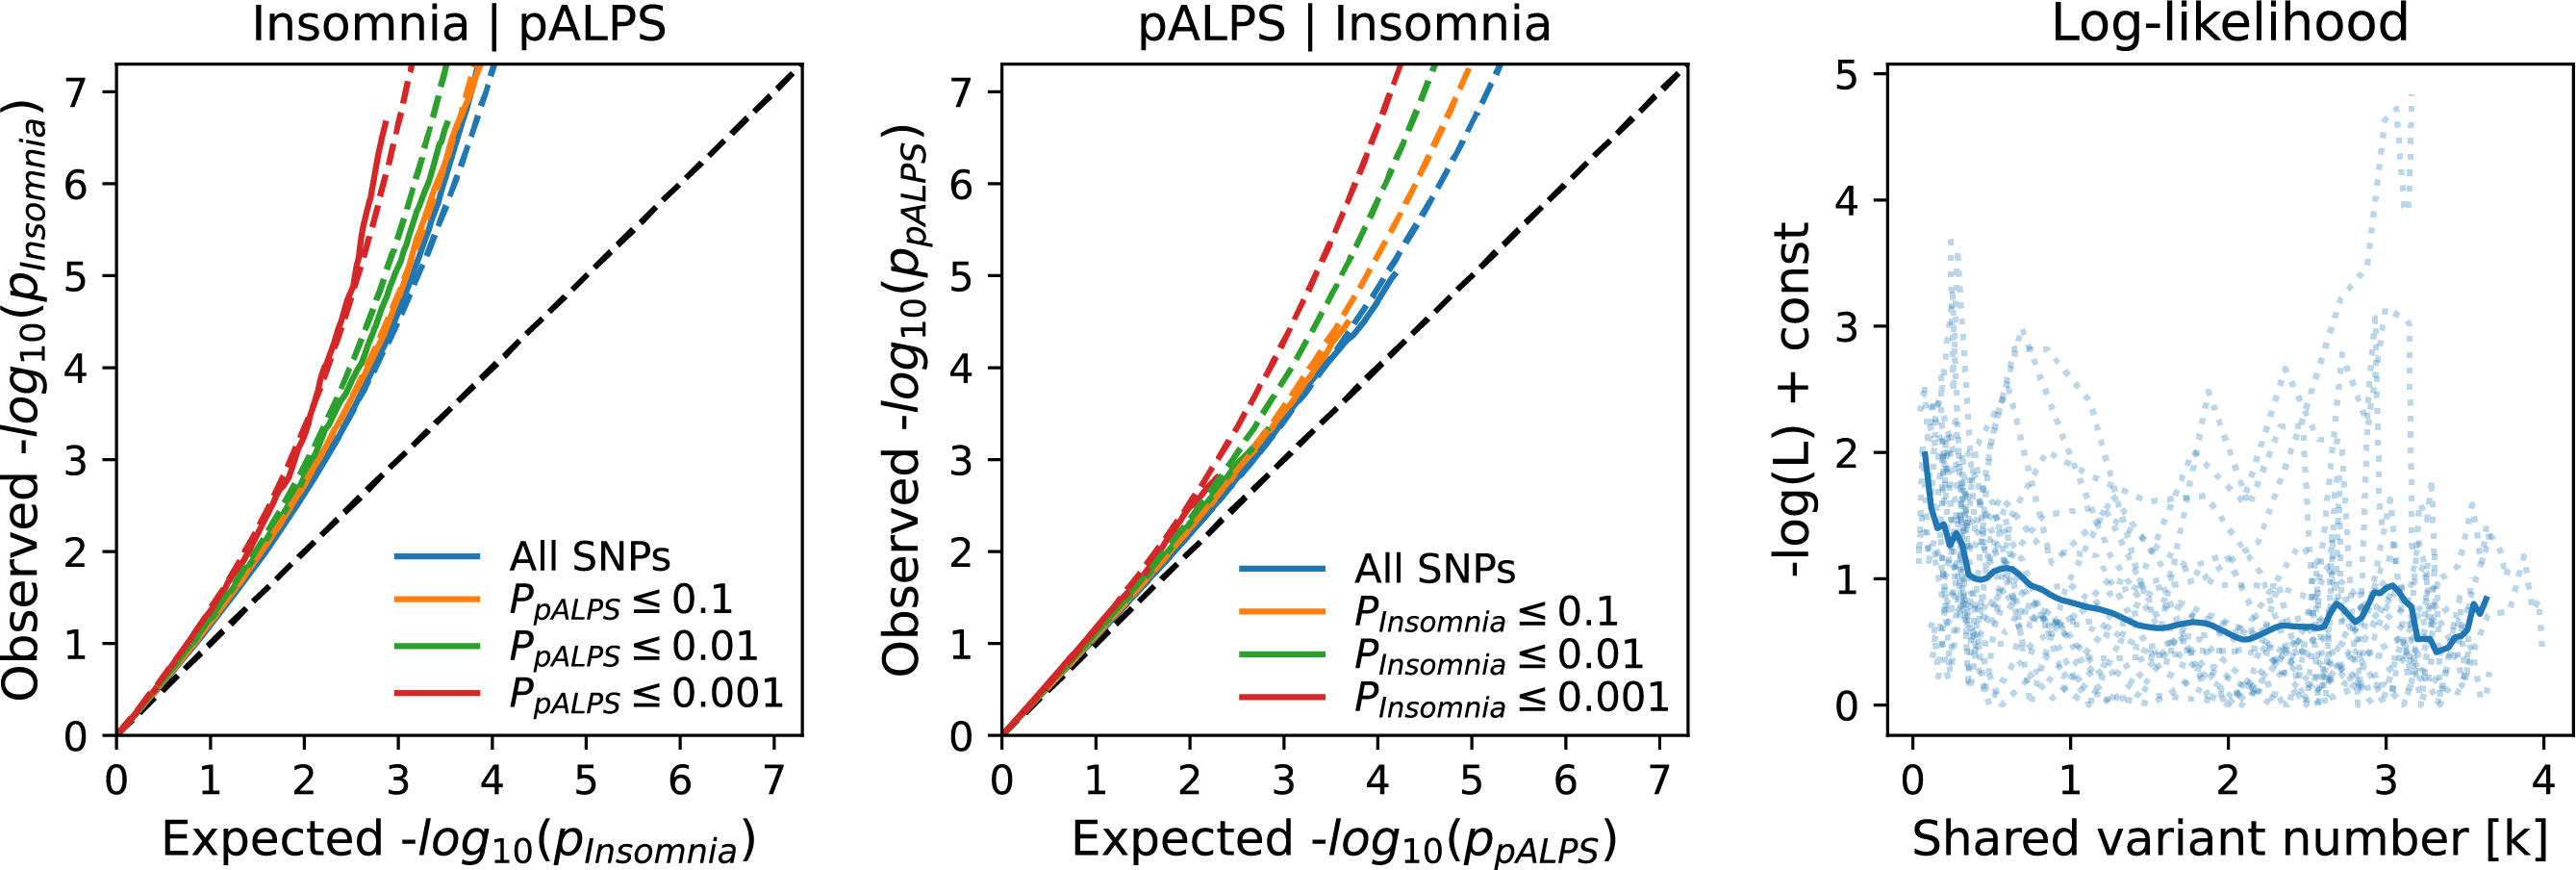


****Figure S3.****Insomnia and pALPS exhibit polygenic overlap. The MiXeR conditional QQ plot indicates enrichment of cross-trait SNPs. Lastly, the log-likelihood estimates from each of the 20 MiXeR iterations are presented.


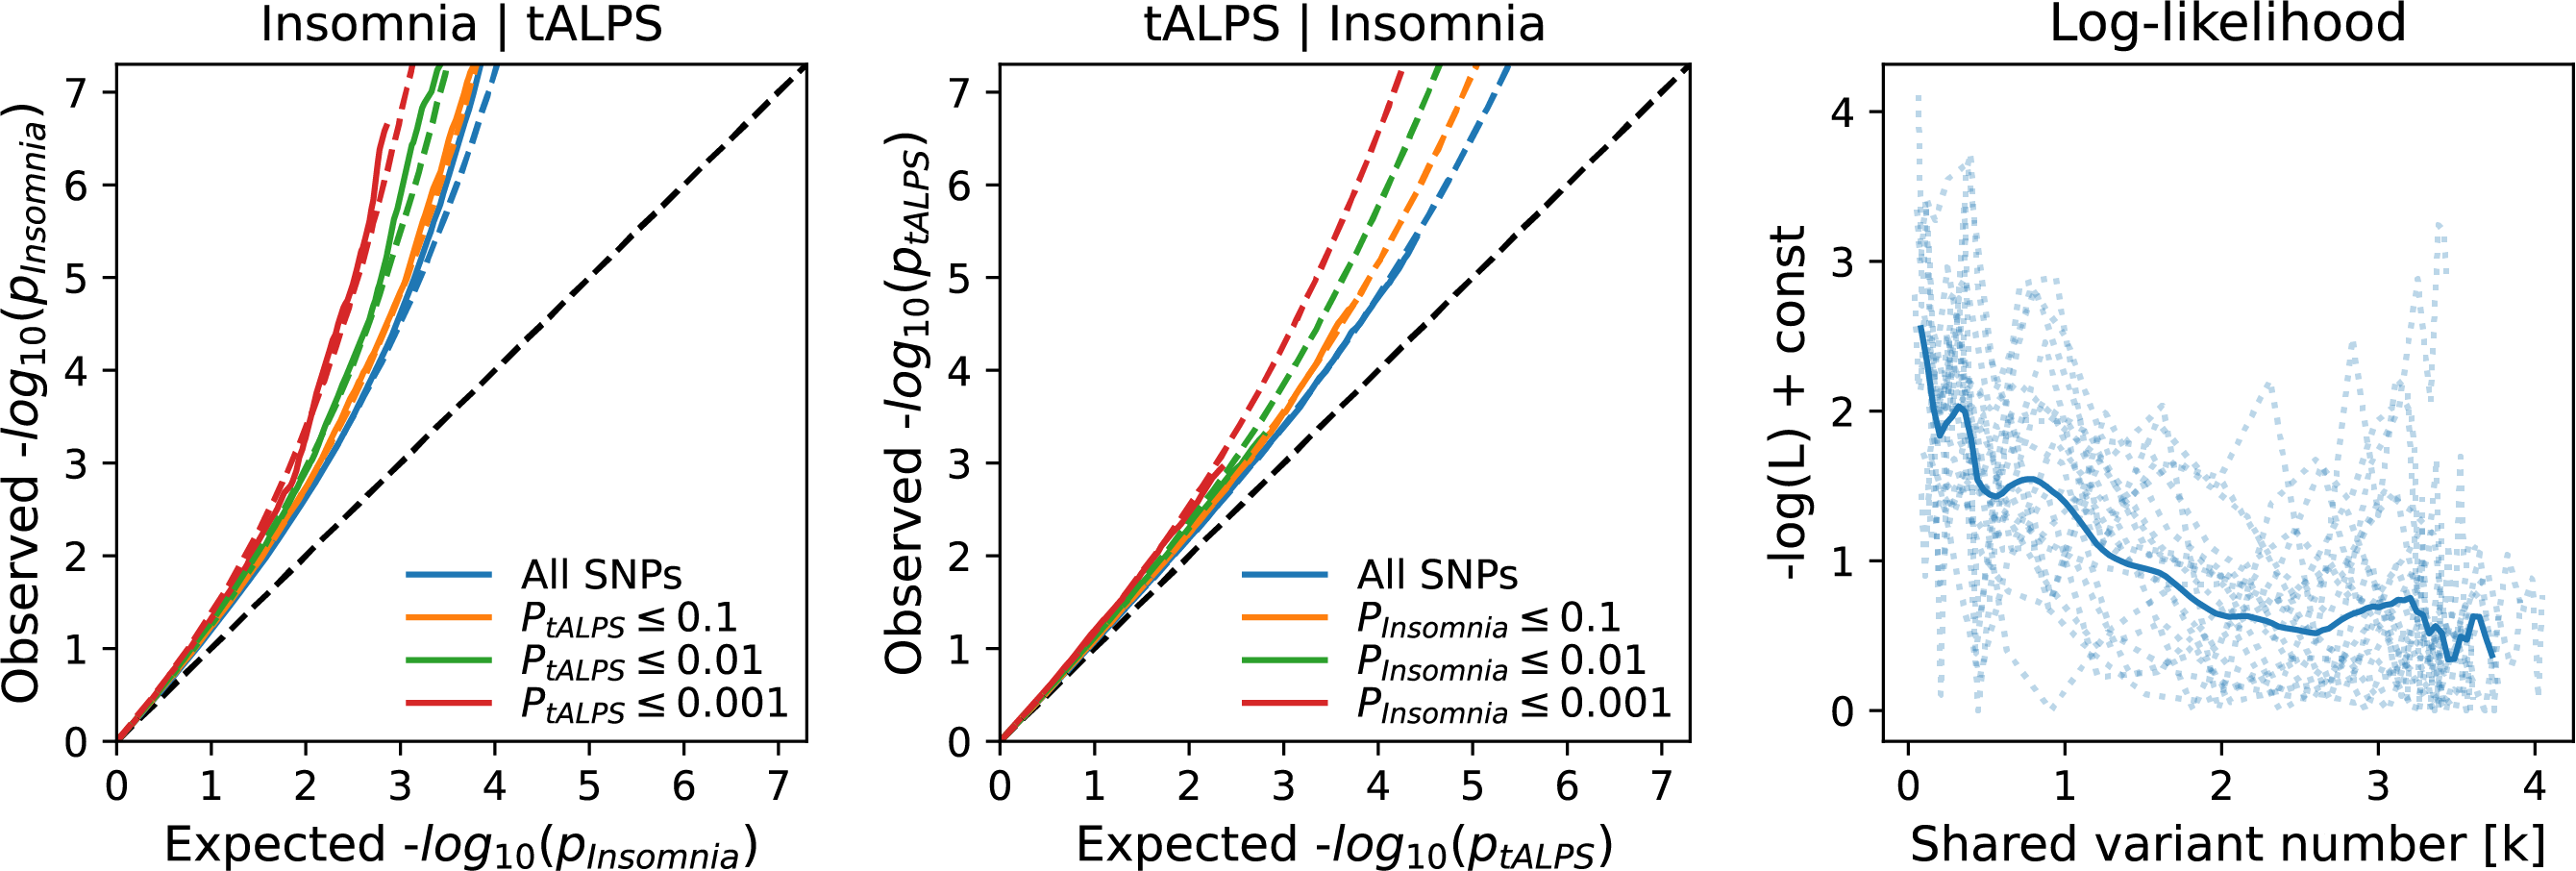


****Figure S4.****Insomnia and tALPS exhibit polygenic overlap. The MiXeR conditional QQ plot indicates enrichment of cross-trait SNPs. Lastly, the log-likelihood estimates from each of the 20 MiXeR iterations are presented.

****
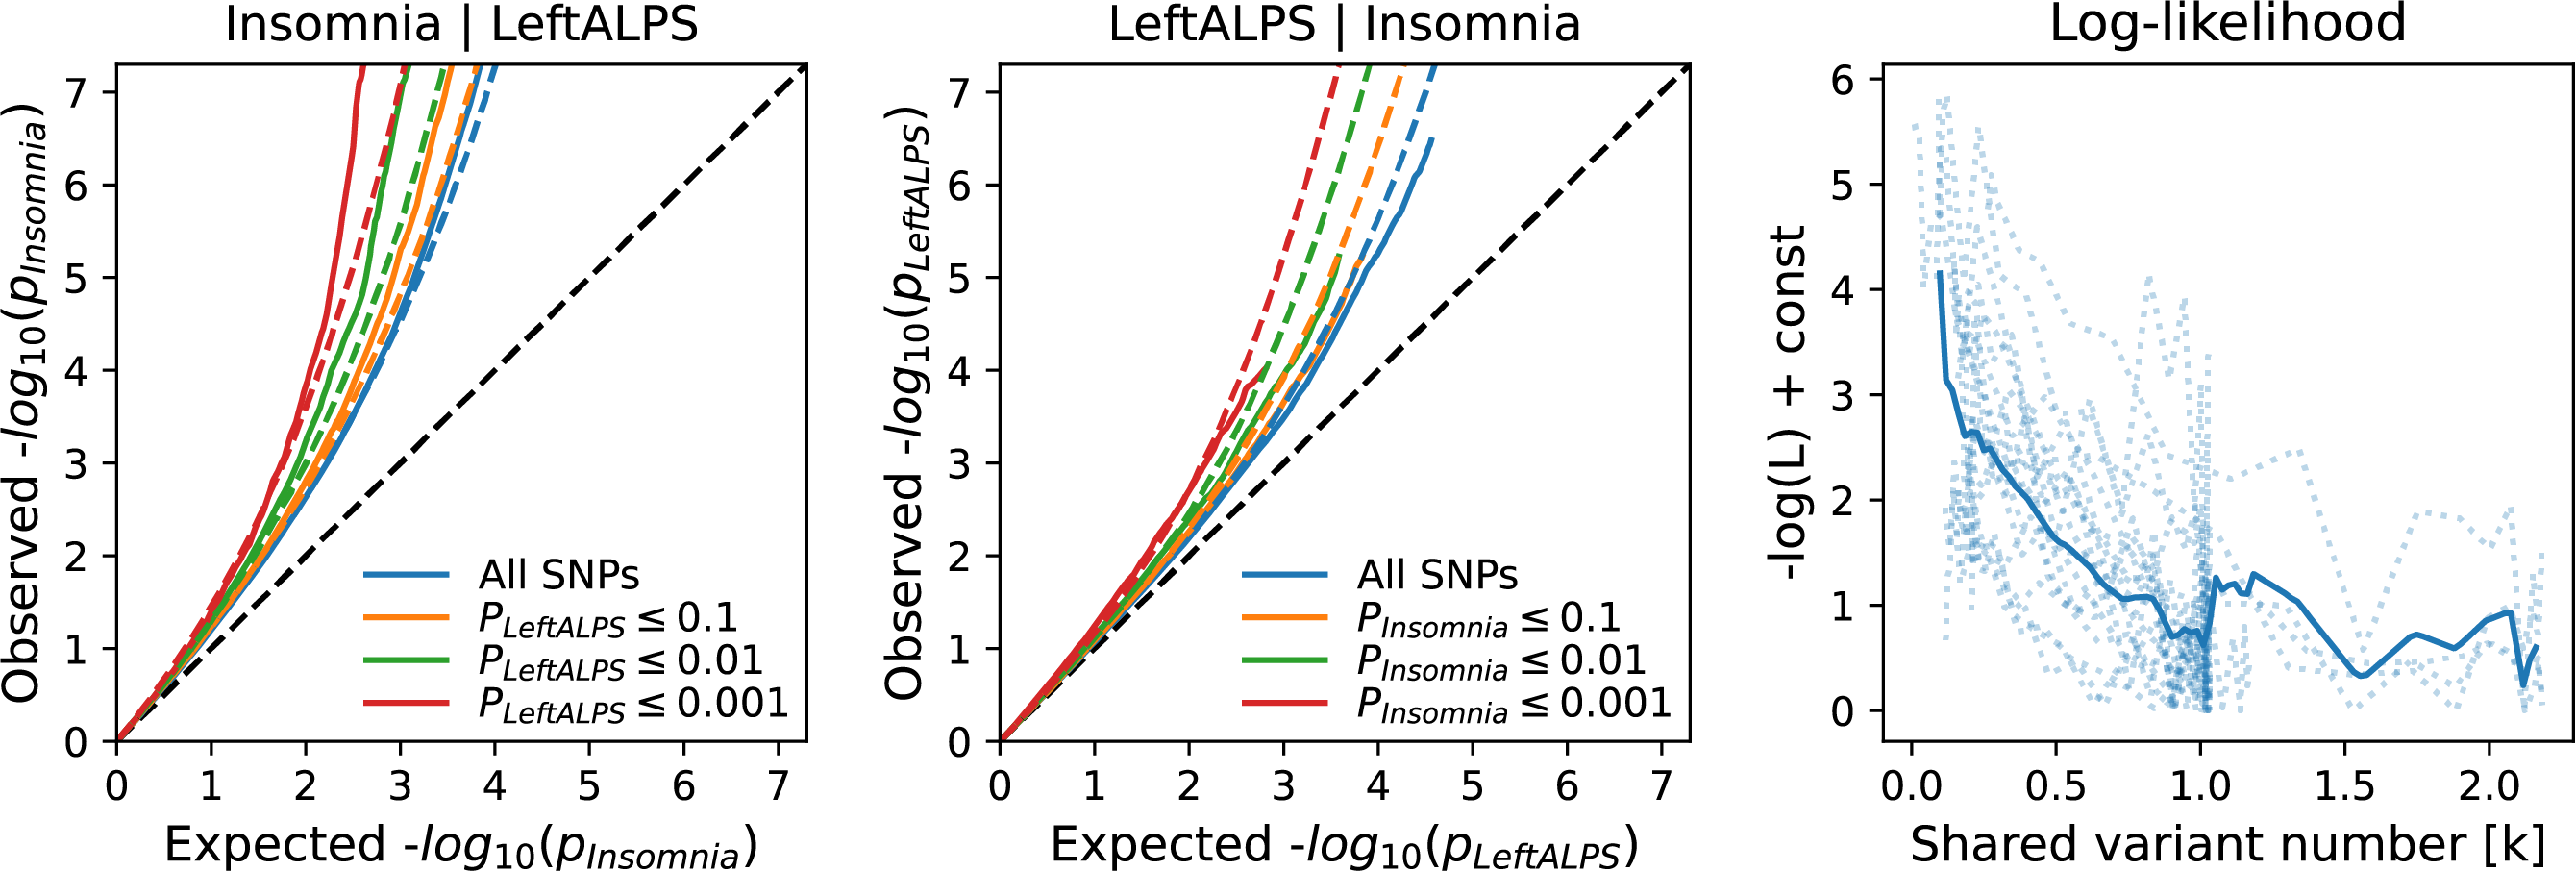
****

****Figure S5.****Insomnia and Left_ALPS exhibit polygenic overlap. The MiXeR conditional QQ plot indicates enrichment of cross-trait SNPs. Lastly, the log-likelihood estimates from each of the 20 MiXeR iterations are presented.


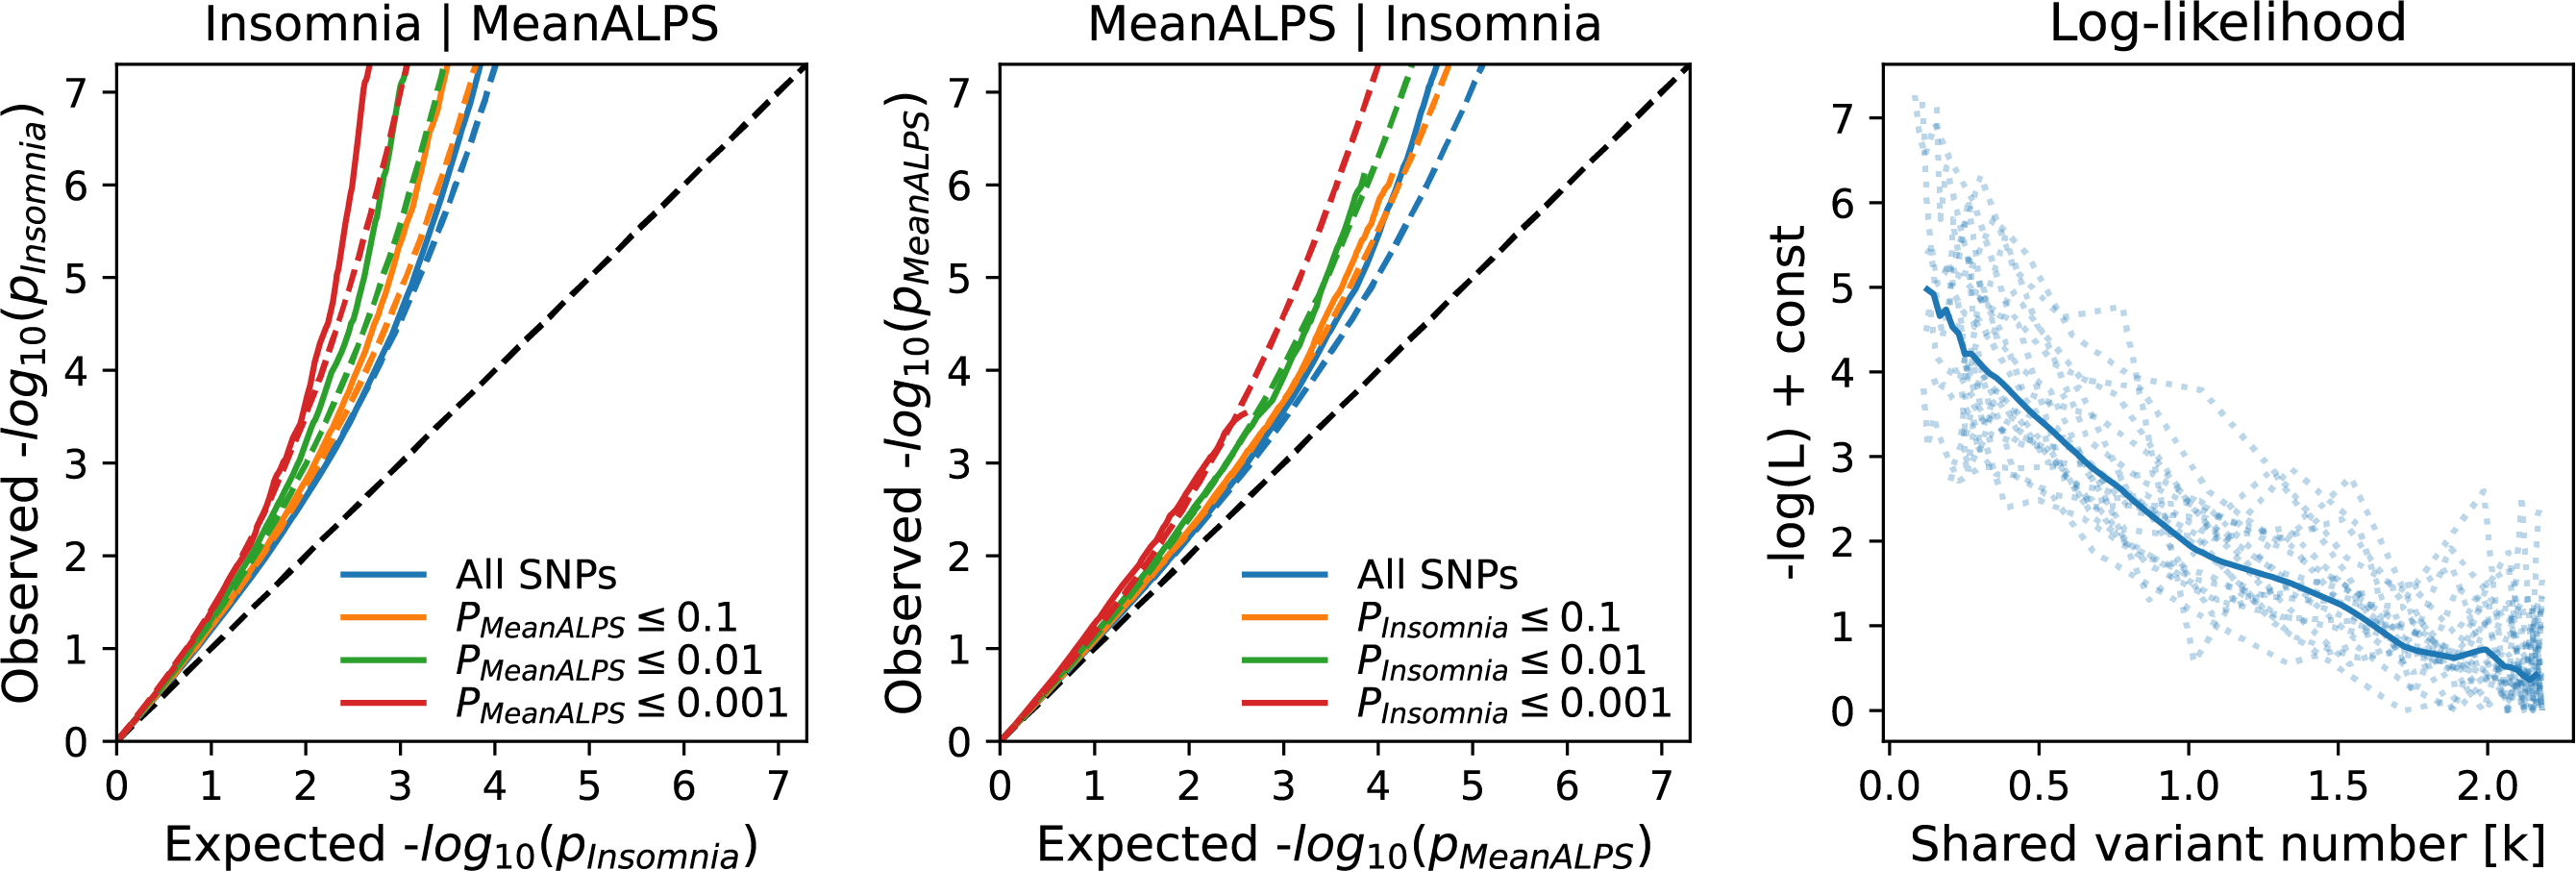


****Figure S6.****Insomnia and Mean_ALPS exhibit polygenic overlap. The MiXeR conditional QQ plot indicates enrichment of cross-trait SNPs. Lastly, the log-likelihood estimates from each of the 20 MiXeR iterations are presented.


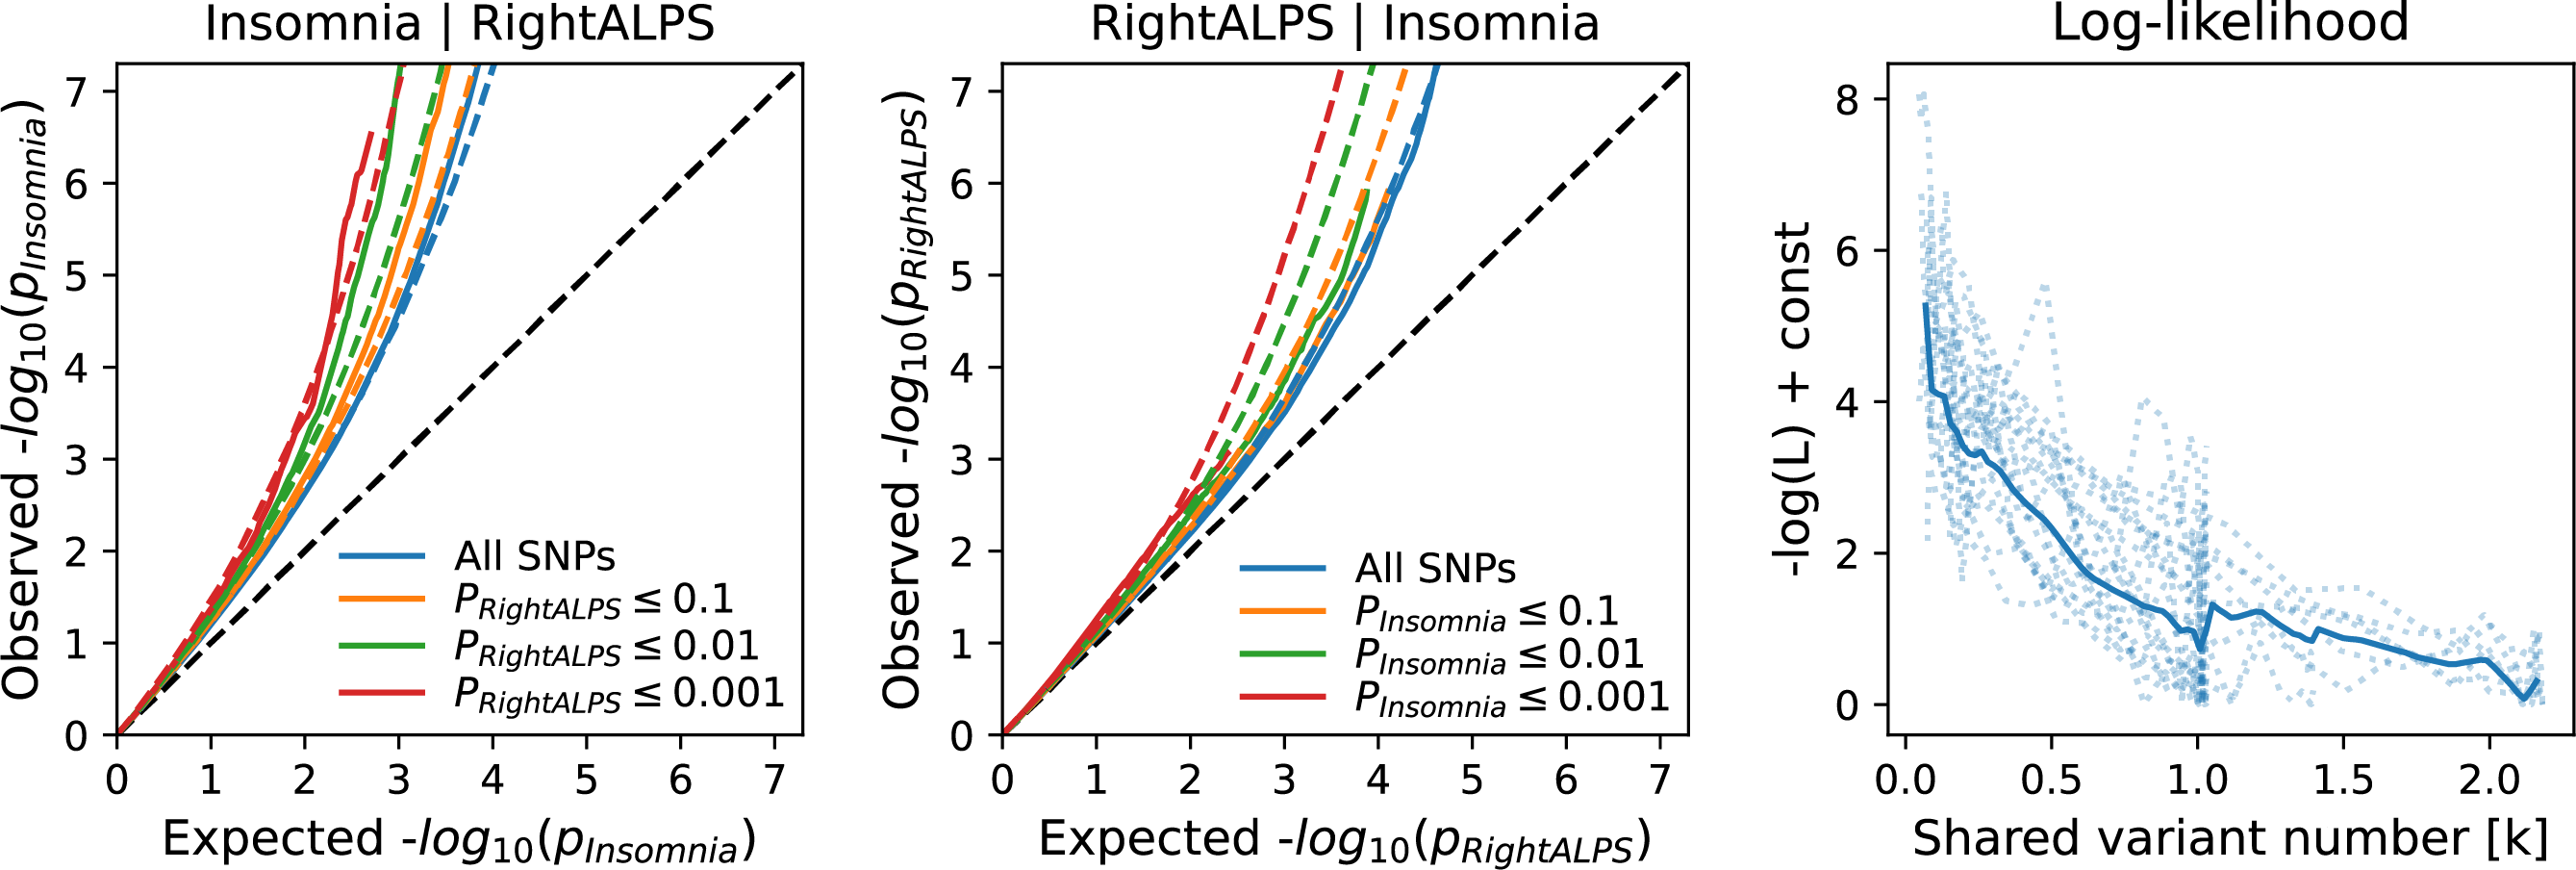


****Figure S7.****Insomnia and Right_ALPS exhibit polygenic overlap. The MiXeR conditional QQ plot indicates enrichment of cross-trait SNPs. Lastly, the log-likelihood estimates from each of the 20 MiXeR iterations are presented.





****Figure S8.****The conditional QQ plot for ALPS is conditioned on Insomnia, while the conditional QQ plot for Insomnia is conditioned on ALPS.
